# Supplementary material for: Functional dichotomy in the 16S rRNA (m1A1408) methyltransferase family and control of catalytic activity via a novel tryptophan mediated loop reorganization
Source: PubMed Central journal article supplement (PMC4705659; doi:10.1093/nar/gkv1306), 2015-11-24
Supplement: supp_gkv1306_nar-02997-h-2015-File008.pdf [file supp_gkv1306_nar-02997-h-2015-File008.pdf]

## SUPPLEMENTARY DATA

### Functional dichotomy in the 16S rRNA (m<sup>1</sup>A1408) methyltransferase family and control of catalytic activity via a novel tryptophan mediated loop reorganization

Marta A. Witek and Graeme L. Conn\*

Department of Biochemistry, Emory University School of Medicine, Atlanta GA 30322, USA.

\*To whom correspondence should be addressed. Tel:+1 (404) 727-5965; Fax: (404) 727-2738 ; E-mail:  
[gconn@emory.edu](mailto:gconn@emory.edu)

#### SUPPLEMENTARY TABLES 1-2

Table S1. X-ray data collection and structure refinement statistics.

Table S2. Differential effects on enzyme activity of substitutions at conserved residues in the *CacKam*, *KamB* and *NpmA* SAM-binding pockets.

#### SUPPLEMENTARY FIGURES S1-S5

Figure S1. Interactions of W203 determine the  $\beta$ 6/7 linker conformation.

Figure S2. Binding of either cosubstrate (SAM) or by-product (SAH) induces flexibility in the  $\beta$ 6/7 linker.

Figure S3. Limited trypsin proteolysis of the  $\beta$ 6/7 linker in wild-type and substituted *CacKam* proteins.

Figure S4. Comparison of the SAM-binding pockets of wild-type and W203 substituted *CacKam*.

Figure S5. Roles of  $\beta$ 6/7 linker residues in activities of *CacKam*, *KamB*, *Kmr* and *NpmA*.

SUPPLEMENTARY TABLES

Table S1. X-ray data collection and structure refinement statistics.

|                                                    | CacKam                                        | CacKam:SAH                                    | CacKam-W203A                                  | CacKam-W203A:SAM                              | CacKam-D21A                                   |
|----------------------------------------------------|-----------------------------------------------|-----------------------------------------------|-----------------------------------------------|-----------------------------------------------|-----------------------------------------------|
| PDB code                                           | 4X1O                                          | 5D1N                                          | 5D1H                                          | 5BW4                                          | 5BW5                                          |
| Space group                                        | P2 <sub>1</sub> 2 <sub>1</sub> 2 <sub>1</sub> | P2 <sub>1</sub> 2 <sub>1</sub> 2 <sub>1</sub> | P2 <sub>1</sub> 2 <sub>1</sub> 2 <sub>1</sub> | P2 <sub>1</sub> 2 <sub>1</sub> 2 <sub>1</sub> | P2 <sub>1</sub> 2 <sub>1</sub> 2 <sub>1</sub> |
| Resolution (Å) <sup>a</sup>                        | 50.00-1.70<br>(1.73-1.70)                     | 50.00-2.70<br>(2.75-2.70)                     | 50.00-2.80<br>(2.85-2.80)                     | 50.00-2.10<br>(2.14-2.10)                     | 50.00-2.50<br>(2.54-2.50)                     |
| Cell dimensions<br>a, b, c (Å)                     | 42.38, 66.11, 80.41                           | 42.74, 65.97, 82.87                           | 66.01, 84.11, 94.37                           | 65.72, 83.23, 93.87                           | 42.95, 66.66, 82.61                           |
| α, β, γ (°)                                        | 90,90,90                                      | 90,90,90                                      | 90,90,90                                      | 90,90,90                                      | 90,90,90                                      |
| Wavelength (Å)                                     | 1.000                                         | 1.000                                         | 1.000                                         | 1.000                                         | 1.000                                         |
| R <sub>merge</sub> <sup>b</sup>                    | 0.072 (0.867)                                 | 0.127 (0.778)                                 | 0.107 (0.588)                                 | 0.082 (0.856)                                 | 0.320 (0.615)                                 |
| I / σI                                             | 32.0 (2.2)                                    | 11.2 (1.9)                                    | 21.4 (3.8)                                    | 26.9 (2.1)                                    | 15.8 (2.4)                                    |
| Completeness (%)                                   | 99.0 (98.4)                                   | 99.2 (100.0)                                  | 93.9 (94.9)                                   | 99.7 (99.9)                                   | 97.9 (86.0)                                   |
| Redundancy                                         | 4.6 (4.7)                                     | 3.9 (4.0)                                     | 4.3 (4.2)                                     | 4.0 (4.0)                                     | 3.5 (2.2)                                     |
| Total. reflections (used)                          | 116,813 (24,665)                              | 26,151 (6,302)                                | 53,650 (12,210)                               | 121,465 (27,026)                              | 29,474 (8,023)                                |
| R <sub>work</sub> / R <sub>free</sub> <sup>d</sup> | 0.177/0.221                                   | 0.213/0.281                                   | 0.183/0.234                                   | 0.183/0.229                                   | 0.239/0.292                                   |
| Number of atoms                                    | 1,832                                         | 1,709                                         | 3,085                                         | 3,320                                         | 1,676                                         |
| Protein                                            | 1,644                                         | 1,687                                         | 3,075                                         | 3,264                                         | 1,641                                         |
| Water                                              | 188                                           | 22                                            | 10                                            | 56                                            | 35                                            |
| B-factors                                          |                                               |                                               |                                               |                                               |                                               |
| Protein                                            | 30.70                                         | 34.20                                         | 54.30                                         | 50.20                                         | 50.90                                         |
| Water                                              | 41.80                                         | 32.40                                         | 41.90                                         | 45.10                                         | 45.10                                         |
| Ramachandran Plot                                  |                                               |                                               |                                               |                                               |                                               |
| Favorable (%)                                      | 98.62                                         | 95.91                                         | 96.27                                         | 96.45                                         | 96.77                                         |
| Outliers (%)                                       | 0.00                                          | 0.00                                          | 0.50                                          | 1.42                                          | 0.00                                          |
| R.m.s. deviations                                  |                                               |                                               |                                               |                                               |                                               |
| Bond lengths (Å)                                   | 0.007                                         | 0.002                                         | 0.003                                         | 0.022                                         | 0.003                                         |
| Bond angles (°)                                    | 1.088                                         | 0.663                                         | 0.754                                         | 2.04                                          | 0.736                                         |

<sup>a</sup>Values in parenthesis are for the highest resolution shell.

<sup>b</sup> $R_{merge} = \sum hkl \sum i |I_i(hkl) - \langle I(hkl) \rangle| / \sum hkl \sum i I_i(hkl)$ .

<sup>c</sup>Figure of merit (FoM),  $m = \cos(\alpha - \alpha_{best})$ .

<sup>d</sup> $R_{work} = \sum hkl |F_o(hkl) - F_c(hkl)| / \sum hkl |F_o(hkl)|$ , where  $F_o$  and  $F_c$  are observed and calculated structure factors, respectively.  $R_{free}$ , applies to the 5% of reflections chosen at random to constitute the test set.

**TABLE S2.** Differential effects on enzyme activity of substitutions at conserved residues in the *CacKam*, *KamB* and *NpmA* SAM-binding pockets.

| Enzyme                          | Kanamycin MIC, $\mu\text{g/ml}$ | Binding affinity, $K_d$ ( $\mu\text{M}$ ) |                 |
|---------------------------------|---------------------------------|-------------------------------------------|-----------------|
|                                 |                                 | SAM                                       | SAH             |
| <i>CacKam</i> -E94A             | 16                              | 29                                        | 2.2             |
| <i>KamB</i> -E88A               | 256                             | 56                                        | 5.3             |
| <i>NpmA</i> -E88A <sup>a</sup>  | 1024                            | NB <sup>b</sup>                           | NB <sup>b</sup> |
| <i>CacKam</i> -S201A            | 16                              | 110                                       | 1.6             |
| <i>KamB</i> -T191A              | 16                              | 48                                        | 5.9             |
| <i>NpmA</i> -S195A <sup>a</sup> | 1024                            | NB <sup>b</sup>                           | 33              |

<sup>a</sup>Data are from reference (14).

<sup>b</sup>NB, denotes no binding detected.

## SUPPLEMENTARY FIGURES

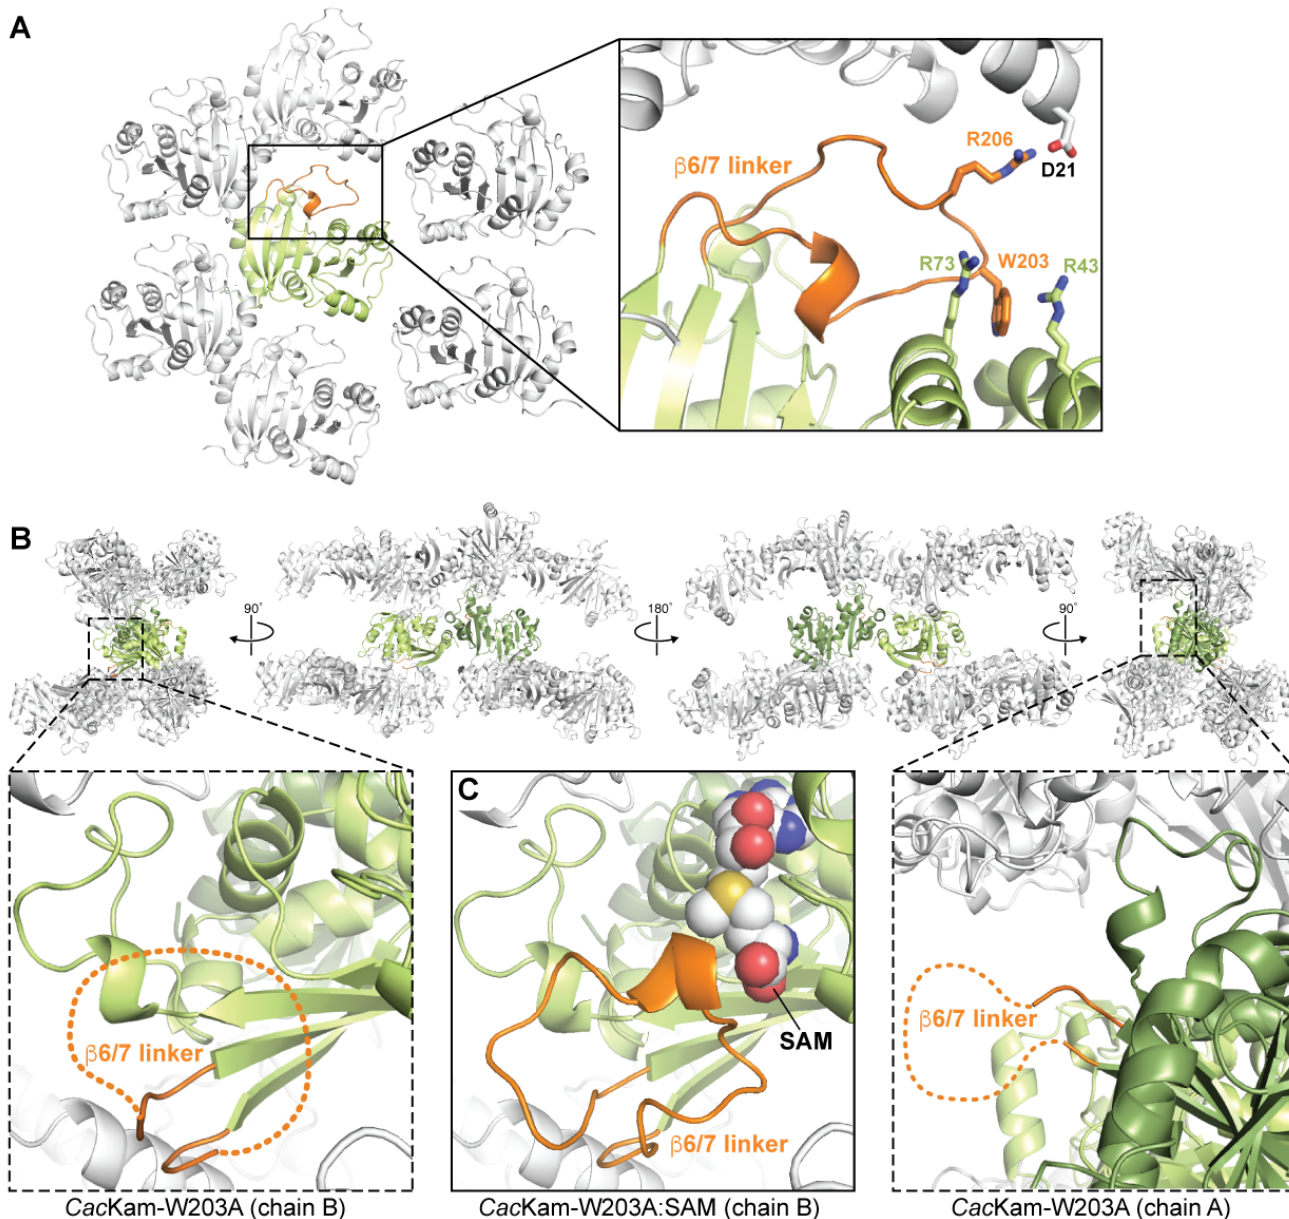

**FIGURE S1. Interactions of W203 determine the  $\beta 6/7$  linker conformation.** **A**, The *apo* CacKam structure with a single molecule in the asymmetric unit highlighting the two major interactions that stabilize the novel  $\beta 6/7$  linker conformation: an *intermolecular* salt bridge between R206 with D21, and an *intramolecular* interaction involving double cation- $\pi$  stacking around W203 by two Arg residues, R43 and R73. **B**, W203A-substituted CacKam crystallizes with a new packing arrangement (two molecules in the asymmetric unit) in which the  $\beta 6/7$  linker is unrestrained by crystal packing, and for which no density was observed to allow modeling of the loop in either molecule. Zoomed views of the region surrounding the disordered  $\beta 6/7$  linker in chains A and B are shown boxed on the *right* and *left*, respectively. **C**, A zoomed view of the structure of the  $\beta 6/7$  linker in chain B of the CacKam-W203A:SAM complex (equivalent to the *left* zoomed view for *apo* CacKam-W203A). Unambiguous density allowed modeling of the loop in a 'closed' conformation that caps the SAM-binding pocket.

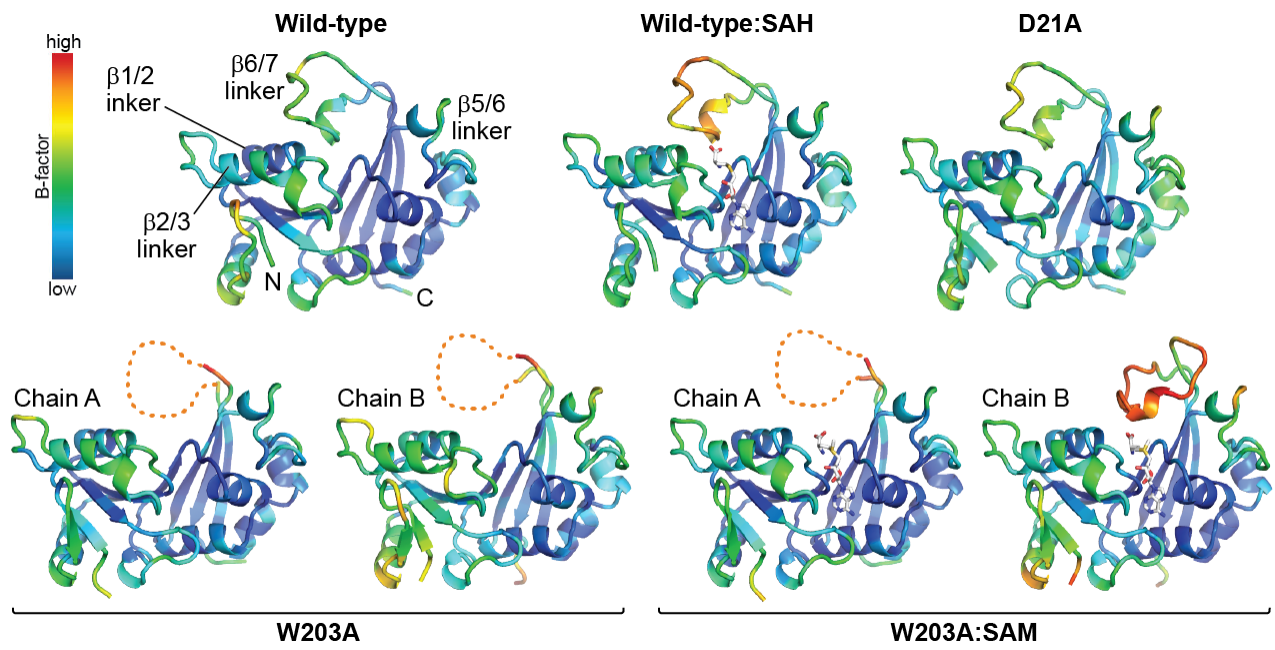

**FIGURE S2. Binding of either cosubstrate (SAM) or by-product (SAH) induces flexibility in the  $\beta$ 6/7 linker.** Structures of wild-type and single amino acid substituted variants shown as cartoons colored by B-factor. Regions of lowest and highest B-factor are shown in blue and red, respectively (full scale shown *top left*).

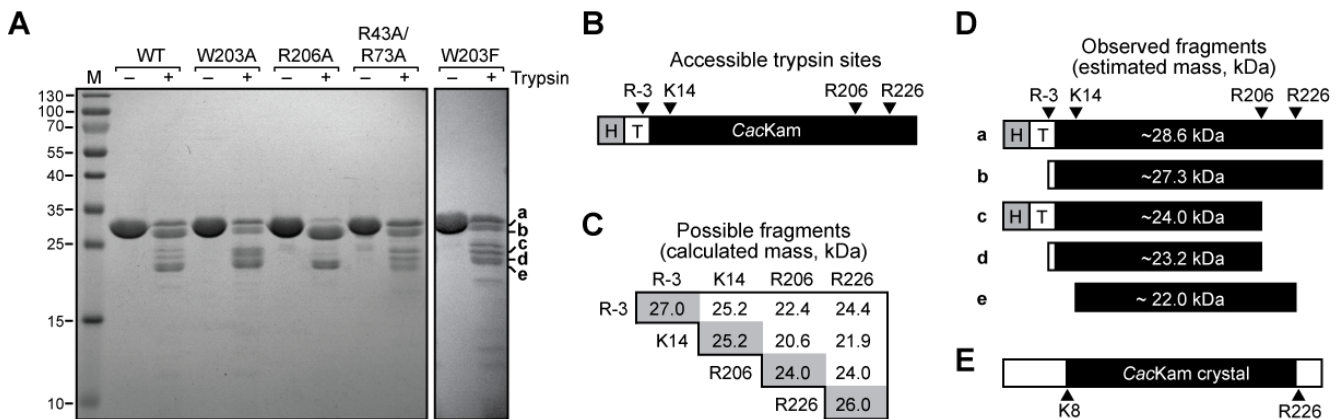

**FIGURE S3. Limited trypsin proteolysis of the  $\beta$ 6/7 linker in wild-type and substituted *CacKam* proteins.** **A**, 16% SDS-PAGE analysis of untreated (-) and trypsin treated (+) wild-type or variant *CacKam* protein. At least five distinct bands (a-e), including the full-length protein (band a), are observed for all except *CacKam*-R206A which has only three (a,d, and e). **B**, Schematic of the full-length protein with predicted accessible trypsin cleavage sites and the locations of N-terminal 6 $\times$ His tag (H) and thrombin protease recognition site (T) indicated. **C**, Possible fragment masses generated by trypsin digest at the putative sites shown in *panel B*. **D**, Additional schematics show the predicted fragments corresponding to each observed band (a-e) on the gel in *panel A*. **E**, The schematic shows the region of the protein modeled (black background) in the *apo* wild-type *CacKam* structure.

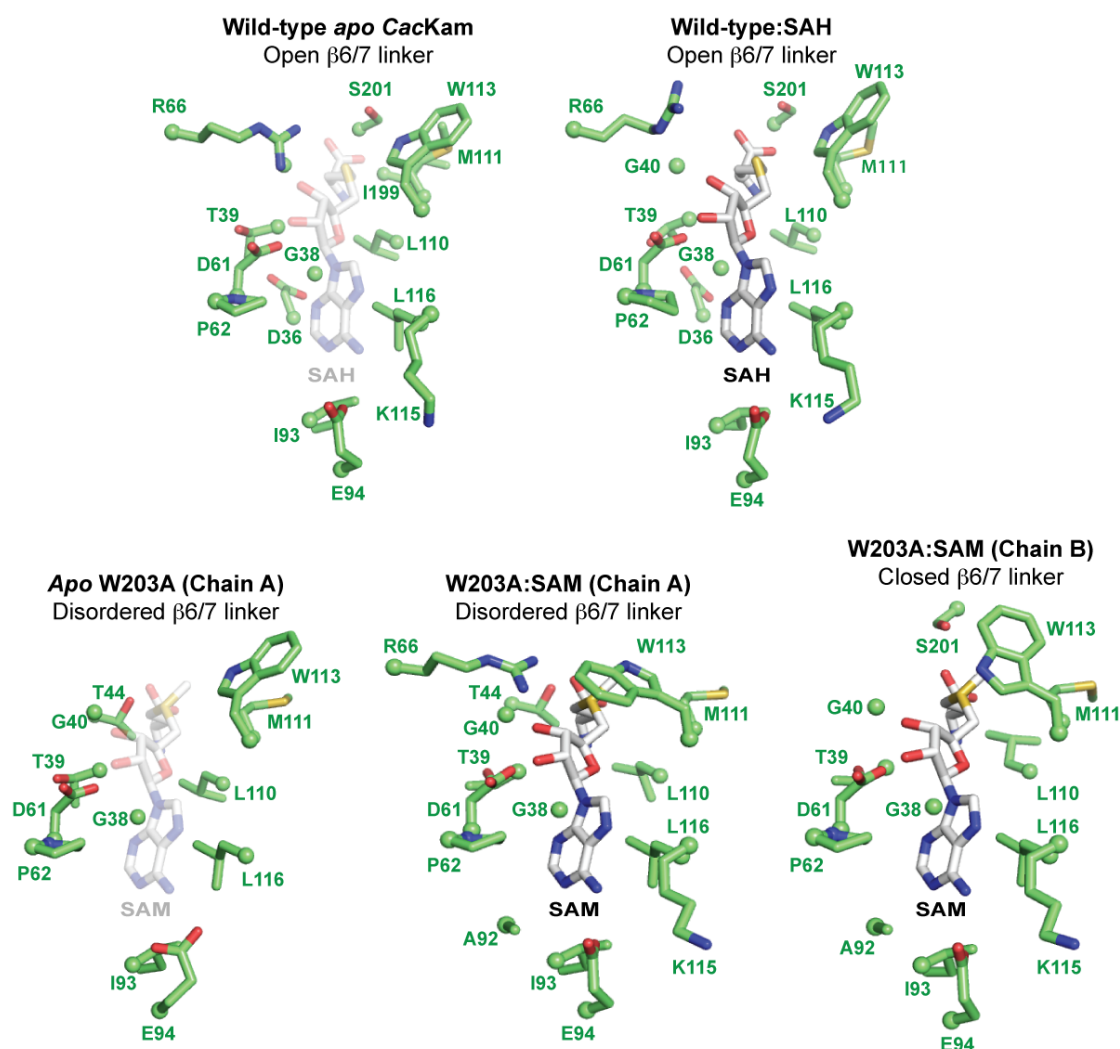

**FIGURE S4. Comparison of the SAM-binding pockets of wild-type and W203 substituted CacKam.**

Residues forming the SAM-binding pockets in *apo* and ligand-bound wild-type CacKam (*top*) and CacKam-W203A (*bottom*). For *apo* protein structures (*left*) the position of SAM or SAH is indicated with the ligand (shown as semi-transparent sticks) taken from the equivalent complex structure (*right*). The SAM-binding pocket in each protein is formed by a largely conserved set of residues with only minor changes observed (e.g. adoption of different rotameric states by S201, R66 and W113 side chains).

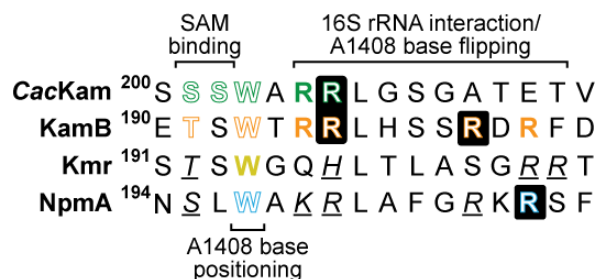

**FIGURE S5. Roles of  $\beta$ 6/7 linker residues in activities of CacKam, KamB, Kmr and NpmA.** Highlighted residues indicate the effect of tested single amino acid substitutions where these inactivate enzymatic activity in kanamycin MIC assays (MIC  $\leq$  10-16  $\mu$ g/ml; colored outline font), have intermediate effect on activity (MIC  $\sim$ 100-600  $\mu$ g/ml; colored) and those with no or minimal impact (MIC  $\geq$  800  $\mu$ g/ml; underlined italic font). Residues shown (NpmA) or proposed (KamB and CacKam) to be involved in base flipping are additionally denoted by a black background.
